## Gene expression signatures predict response to therapy with growth hormone

Adam Stevens PhD<sup>1†</sup>, Philip Murray MD<sup>1†</sup>, Chiara De Leonibus MD<sup>1</sup>, Terence Garner MSc<sup>1</sup>, Ekaterina Koledova MD<sup>2</sup>, Geoffrey Ambler MD<sup>3</sup>, Jia-Woei Hou MD<sup>4</sup>, Klaus Kapelari MD<sup>5</sup>, Jean Pierre Salles MD<sup>6</sup>, Gerhard Binder MD<sup>7</sup>, Mohamad Maghnie MD<sup>8</sup>, Stefano Zucchini MD<sup>9</sup>, Elena Bashnina MD<sup>10</sup>, Julia Skorodok MD<sup>11</sup>, Diego Yeste MD<sup>12</sup>, Alicia Belgorosky MD<sup>13</sup>, Juan-Pedro Lopez Siguero MD<sup>14</sup>, Regis Coutant MD<sup>15</sup>, Eirik Vangsøy-Hansen MD<sup>16</sup>, Lars Hagenäs MD<sup>17</sup>, Jovanna Dahlgren MD<sup>18</sup>, Cheri Deal MD<sup>19</sup>, Pierre Chatelain MD<sup>20</sup>, Peter Clayton MD\*<sup>1</sup>

<sup>1</sup> Division of Developmental Biology & Medicine, Faculty of Biology, Medicine & Health, University of Manchester and Manchester Academic Health Science Centre, Royal Manchester Children's Hospital, Manchester University Hospitals NHS Foundation Trust; <sup>2</sup> Merck Healthcare KGaA, an affiliation of Merck KGaA, Germany; <sup>3</sup>The Children's Hospital, Westmead, Australia; <sup>4</sup>Cathy General Hospital, Taipei, Taiwan; <sup>5</sup>Medical University Innsbruck, Innsbruck, Austria; <sup>6</sup>Hopital des Enfants, Toulouse, France; <sup>7</sup>University-Children's Hospital, Tuebingen, Germany; <sup>8</sup>IRCCS G. Gaslini, Genova, Italy; <sup>9</sup>University of Bologna, Bologna, Italy; <sup>10</sup>North-Western State Medical University, Saint-Petersburg, Russian Federation; <sup>11</sup>Saint-Petersburg State Medical University, Saint-Petersburg, Russian Federation; <sup>12</sup>Hospital Materno Infantil Vall d'Hebron, Barcelona, Spain; <sup>13</sup>Fundacion Hospital de Pediatria, Buenos Aires, Argentina; <sup>14</sup>Children's Hospital Malaga, Malaga, Spain; <sup>15</sup>University Hospital, Angers, France; <sup>16</sup>Haukeland University Hospital, Bergen, Norway; <sup>17</sup>Karolinska Hospital, Stockholm, Sweden; <sup>18</sup>University of Gothenburg, Sahlgrenska University Hospital, Gothenburg, Sweden; <sup>19</sup>University of Montreal, Montreal, Canada; <sup>20</sup>Department Pediatrie, Hôpital Mère-Enfant – Université Claude Bernard, 69677 Lyon, France, 3 St. Mary's Hospital, MAHSC.

† These authors contributed equally to the work.

\* To whom correspondence should be addressed: [peter.clayton@manchester.ac.uk](mailto:peter.clayton@manchester.ac.uk)

**One Sentence Summary:** A blood transcriptome signature predicts response to recombinant human growth hormone in both growth hormone deficient and Turner syndrome children

**Word count:** 4060      **Figures:** 8      **Tables:** 4

**Key words:** Gene expression, growth hormone (GH) deficiency, Turner syndrome, GH treatment.

**Trial registration numbers:** NCT00256126 & NCT00699855

1 **Abstract**

2 Recombinant human growth hormone (r-hGH) is used as a therapeutic agent for disorders of growth including  
3 growth hormone deficiency (GHD) and Turner syndrome (TS). Treatment is costly and current methods to  
4 model response can only account for up to 60% of the variance. The aim of this work was to take a novel  
5 genomic approach to growth prediction. GHD (n=71) and TS patients (n=43) were recruited in a study on the  
6 long term response to r-hGH over five years of therapy. Pharmacogenomic analysis was performed using 1219  
7 genetic markers and baseline blood transcriptome. Random forest was used to determine predictive value of  
8 transcriptomic data associated with growth response. No genetic marker passed the stringency criteria  
9 required for predictive value. However, we demonstrated that transcriptomic data can be used to predict  
10 growth with a high accuracy (AUC > 0.9) for short and long term therapeutic response in GHD and TS. Network  
11 models identified an identical core set of genes in both GHD and TS at each year of therapy whose expression  
12 can be used to classify therapeutic response to r-hGH. Combining transcriptomic markers with clinical  
13 phenotype was shown to significantly reduce predictive error. We have characterised the utility of baseline  
14 transcriptome for the prediction of growth response including the identification of a set of common genes in  
15 GHD and TS. This work could be translated into a single genomic test linked to a prediction algorithm to  
16 improve clinical management.

17

18 **Word count 238**

19

20

21

22

23

24

25

26

## 27 **Introduction**

28 Recombinant human growth hormone (r-hGH) is used as a therapeutic agent for a range of disorders of growth  
29 impairment including growth hormone deficiency (GHD) and Turner syndrome (TS). Treatment is costly at  
30 between £6000 – £24000 per centimetre (cm) gained in final height (1). Therapy is not always successful in  
31 patients and there are currently no genomic markers for predicting positive or negative responses. Prediction  
32 models up to four years of therapy have been defined using clinical measurements (2) but have been difficult  
33 to implement in practise. Whilst an understanding of the pharmacogenetic background has been established  
34 (3, 4), such approaches are of limited predictive value due to the influence of covariates related to the child's  
35 developmental stage, disease severity and geographical location (5, 6). The pre-treatment blood  
36 transcriptome has been previously shown to relate to first year response to r-hGH therapy (7), however, little  
37 is known about the predictive value of this association and its relationship to longer term response to therapy.  
38 The transcriptome represents a level of 'omic' data that reflects genetic information, developmental stage in  
39 relation to age (8) along with the impact of the local environment (6) and, therefore, has potential to classify  
40 response to r-hGH.

41 Response to r-hGH in the first year of therapy is considered to be a primary marker of growth response.  
42 Prediction of first year growth has been shown to be dependent on GHD severity, age, distance to target  
43 height, body weight, dose of r-hGH, birth weight and, as defined by regression models, can account for 61%  
44 in GHD (9) and 46% in TS (10, 11) of the variation within the data. Clinical markers such as distance to target  
45 height are surrogate genetic variables and this implies that an effective level of genomic prediction is  
46 hypothesised to be possible if developmental (8, 12) and environmental covariates (13) of growth response  
47 can be taken into account.

48 Transcriptomic data have been used extensively in cancer tissues both to sub-type the tumour (14-16) and to  
49 predict response to therapies (17, 18). In contrast in this study we have used peripheral blood gene expression  
50 profiling as the source for gene expression profiles, and show that these patterns can be used to predict  
51 response to r-hGH in each year of treatment up to five years in two different growth disorders that account  
52 for approximately 60% of GH prescriptions.

53 **Results**

54 *Growth response of patients over five years of r-hGH treatment*

55 The auxology of the PREDICT study has been previously described at baseline and after one year (7) and after  
56 three years (5) of therapy with r-hGH. Height velocities as a measure of response to r-hGH at each year in GHD  
57 and TS are shown in **Table 1A**. As expected, first year growth response is the largest with a decline in  
58 subsequent years to a maintenance growth rate (19).

59

60 *Genetic associations were not robust enough to be used to predict changes in growth rate over the five years*  
61 *of the study*

62 The association between SNP carriage and growth response was assessed for 1096 and 792 growth-related  
63 candidate genes, in GHD and TS respectively, which passed the filtering criterion. Whilst 113 SNPs were  
64 associated with growth response endpoints with an FDR p-value <0.05 modified by the number of blocks of  
65 linkage disequilibrium, none of these were deemed to pass the stringency criteria required for predictive value  
66 **(Supplemental Table S1A-E)**.

67

68 *Unsupervised and supervised analysis demonstrates that GHD and TS blood transcriptome at baseline can be*  
69 *used to classify response to r-hGH therapy over five years of treatment*

70 We first demonstrated that a fundamental relationship existed between the baseline blood transcriptome and  
71 response to r-hGH over the 5 years of the study (GHD n= 50, TS n=22) using DAPC on the unsupervised baseline  
72 transcriptome (GHD = 8875, TS = 8455 gene probe sets). These analyses showed clear segregation of the low  
73 response (LoQ) and the high response (HiQ) quartiles of response to r-hGH thus demonstrating the utility of  
74 blood transcriptome to differentiate response groups (**Figure 1**). Partial least squares Discriminant Analysis  
75 (PLS-DA) of the unsupervised baseline transcriptome demonstrated similar findings (**Figure 2**).

76

77 *GHD and TS blood transcriptome at baseline can be used to classify response to r-hGH therapy year-on-year*  
78 *over five years of treatment*

79 Baseline gene expression associated with height velocity at each year of the five years after the start of  
80 treatment with r-hGH was defined using rank regression ( $p < 0.01$ ) (**Supplemental Table S2**) with a range of  
81 covariates – microarray batch, age, body mass index (BMI) at baseline for both GHD and TS patients along with  
82 gender and peak GH test response in GHD. Tanner stage was added as a further covariate to account for the  
83 pubertal status of the patients (**Figure 3**). There was no difference in auxology at baseline between each group  
84 of patients at each year of the study (**Table 1B & Supplemental Table S2**). First classification of low and high  
85 responding quartile groups of patients was assessed by PLS-DA using unmodified class sizes (**Supplemental**  
86 **Table S3A & 3B**): clear separation of the quartiles was observed (example of first year GHD response, **Figure**  
87 **4**). We also examined classification of growth response using random forest (RF) with oversampling by SMOTE  
88 to correct for uneven class size (GHD, **Supplemental Table S3A** and TS, **Supplemental Table S3B**). These data  
89 show clear classification of good and poor responders: at each year of the study all PLS-DA area under the  
90 curve of the receiver operating characteristics (AUCs) were between 73% and 98% and all RF AUCs were  
91 between 78% and 98% in both conditions.

92

### 93 Interactome network models of response to r-hGH

94 There was limited overlap between GHD and TS whole blood transcriptomic markers related to growth  
95 response at each year of the study (**Supplemental Table S2**). We therefore generated interactome network  
96 models including inferred interactions to assess whether GHD and TS growth response-associated gene  
97 expression was related by affecting the function of similar network modules, albeit in different ways.  
98 Interactome network models of gene expression associated with height velocity at each year of the study were  
99 generated. The hierarchy of overlapping modules of genes was identified in each network using the network  
100 topology parameter of “centrality” (**Supplemental Table S4**). Network centrality is measurement that is known  
101 to be related to gene function within networks; the more central a gene is, the more capable it is of influencing  
102 other genes within the network (20).  
103 The gene level summary of SNP associations with change in height and height velocity measurements with  
104 FDR  $< 0.05$  (**Supplemental Table S1C and S1D**) were mapped onto the network models (**Supplemental Table**

105 **S4)**. Most of the genetic associations with change in height and height velocity were also present within the  
106 network models – 15/25 SNPs in GHD and 9/12 in TS (**Supplemental Table S5**), implying that these genes have  
107 a functional role in network action.

108 Network models associated with height velocity in each year in both GHD and TS demonstrated significant  
109 overlaps (Hypergeometric test,  $p < 0.01$ ) (**Figure 5**). These observations imply that whilst associated gene  
110 expression may be different between GHD and TS, common network elements are being affected in the two  
111 conditions.

112 The overlap between network models formed a discrete interactome element shared between GHD and TS  
113 (**Figure 6**). When this network was partitioned into genes related to each year of response to r-hGH (coloured  
114 **Figure 6A**), it was determined that the genes associated with year 3 formed a less distinct cluster within the  
115 network (**Figure 6B**). This observation is in alignment with a partition between early (years 1 and 2) and later  
116 (years 4 and 5) response to r-hGH as would be expected clinically.

117 The facts that **i)** genetic associations with growth response map to the network models derived from  
118 transcriptomic data and that **ii)** the network connectivity of the central modules changes over the duration of  
119 the study imply that the network models are robust and account for the effect of development on related  
120 phenotype (**Supplemental Table S5**).

121

#### 122 The Identification of core sets of genes that can classify response to r-hGH in both GHD and TS

123 The overlap between network models was used to select a common set of genes at each year of therapy  
124 present in both GHD and TS. Genes within this common list were selected for growth response classification  
125 if they had previously been identified as significantly associated with height velocity by rank regression in  
126 either GHD or TS ( $p < 0.05$ ) (**Figure 6C & Supplemental Table S2**).

127 Classification of both high and low r-hGH response quartiles against the remaining patients was shown using  
128 PLS-DA (no oversampling) and RF (using SMOTE oversampling). All AUCs for classification were between 74%  
129 and 96% (**Supplemental Table S6**).

130 Further confidence in the findings was provided by assessing the predictive quality of the gene probe sets  
131 using BORUTA to define the limits of the noise in the analysis using a 100-fold permutation of the data (e.g.  
132 first year growth response **Figure 7 & Supplemental Table S7**).

133

134 The core sets of genes with expression in whole blood that can classify response to r-hGH in both GHD and TS  
135 are associated with differential genomic methylation

136 Changes in genomic methylation in response to short term treatment with r-hGH (4 days) have been  
137 demonstrated in children with range of conditions that manifest short stature (21). Using the data provided  
138 by this previously published study we examined the epigenome at baseline (prior to r-hGH treatment) in  
139 relation to growth response (measured by knemometry) in GHD patients (n=6) and found that using a gene  
140 level summary of DNA methylation (20618 genes) 497 had methylation associated with growth response to r-  
141 hGH (rank regression,  $p < 0.01$ ) (**Figure 8**). The majority of associated genes (425/497) were hypermethylated  
142 at lower rates of growth response.

143 We took the core sets of genes previously identified as classifiers of response to r-hGH in both GHD and TS  
144 and mapped gene level methylation present in the six GHD patients with knemometry measurements. The  
145 majority of genes (57/71) were correlated with growth response ( $|R| > 0.3$ ) these were evenly distributed  
146 between positive (n=27/71) and negative (n=30/71) correlations (year one data shown in **Figure 8B**).

147

148 Transcriptomic markers combined with phenotype lead to better growth response prediction

149 It is known that the baseline phenotype of GHD and TS patients can be used to predict response to r-hGH (2,  
150 22-24). We found that including the blood transcriptome markers increased predictive value at each year by  
151 an average of 7% ( $p = 0.0031$ ) and 4% ( $p = 0.0365$ ) (prediction of low quartile) along with 4% ( $p = 0.0179$ ) and 4%  
152 ( $p = 0.0097$ ) (prediction of high quartile) in GHD and TS respectively (**Table S8**).

153 Importantly we also noted a significant decrease of error rate in the prediction of growth response at each  
154 year when blood transcriptome markers were combined with clinical phenotype markers. Error rates  
155 decreased by an average of 5% ( $p = 0.0084$ ) and 5% ( $p = 0.0400$ ) (prediction of low quartile) along with 5%

156 (p=0.0252) and 5% (p=0.0067) (prediction of high quartile) in GHD and TS respectively (**Table S8**). The  
157 reduction observed amounted to an average halving of the error rate seen when predicting response to r-hGH  
158 using clinical phenotype markers alone.

159

## 160 **Discussion**

161 This study aimed to identify for the first time the genomic associations that classify response to r-hGH therapy  
162 from one year up to five years of treatment with r-hGH in children with TS and GHD.

163 Our previous analysis has shown limited utility of genetic associations derived from a candidate set of growth  
164 related genes in the prediction of response to r-hGH in GHD and TS after one year of therapy (5, 7, 25). Hence  
165 genetic data do not appear to be powerful enough on their own to be used in prediction and clinical  
166 management.

167 The whole blood transcriptomic profile of GHD and TS patients has been shown to be associated with first year  
168 growth response to r-hGH (7) and to correlate with the interaction between GHRd3 and GHD severity (25). We  
169 therefore reasoned that there may be value in using transcriptomic data to classify growth response, as it  
170 reflects both a child's genetic profile and the complex clinical phenotypes arising from changes in physical  
171 development during childhood, as well as variation in the severity of the underlying condition. By normalising  
172 gene expression for phenotype, including pubertal stage, we were able to show that whole blood  
173 transcriptomic data, associated with height velocity at each year of the study, could be used to classify both  
174 the low and high quartiles of growth response, with 'Area under the Curve' up to 97%, providing the basis for  
175 a predictive test.

176 Little overlap between GHD and TS was observed between the gene expression data that was associated with  
177 each year of growth response. We therefore investigated whether GHD and TS were interacting with similar  
178 functional units of genes using network models (26). We generated network models of growth response (as  
179 determined by height velocity) at each of the five years of treatment using baseline gene expression.  
180 Functional modules of genes within these models were ranked according to their network centrality. The  
181 measure of network centrality is known to be associated with mechanism (27, 28) and we used this measure



182 to define the functional hierarchy of the modules of genes whose expression was linked to r-hGH response at  
183 each year of therapy.

184 We demonstrated robustness of the network modules identified by mapping the genetic associations  
185 identified in this study to the network models. This process highlighted genes previously identified as  
186 associated with growth response after one year of therapy (*GRB10*, *SOS1* and *INPPL1* in GHD) (7) along with  
187 one month change in serum IGF-I associated with r-hGH therapy (*CDK4*) (29). It was also noted that three  
188 genes were present (*INPPL1* and *SOS1* in GHD and *PTPN1* in TS) out of the four genes identified within the  
189 PREDICT validation study as having replicated an association with first year growth response when controlled  
190 for co-variates (5).

191 A significant overlap between the core network gene modules between GHD and TS was identified. We then  
192 used gene expression changes associated with growth response within these network elements to identify  
193 genes common to both conditions and show that their expression could be used to classify growth response.  
194 The major strength of this study is to have identified predictive markers and common genomic mechanisms  
195 related to early and later growth in two different growth disorders. Our findings are also supported by the  
196 demonstration of differential methylation in these shared genes, associated with response to r-hGH in another  
197 study (30). Importantly we have defined sets of gene expression with predictive value in two conditions where  
198 the number of genes (17–26) is smaller than the number of patients in the group (33-70) [Table S2 & S6]; this  
199 indicates that the findings are not a consequence of overfitting (31).

200 In this study we have compared the use of baseline patient auxology to blood transcriptome in predicting  
201 response to r-hGH. Linear models based on baseline patient auxology can account for ~40-60% of the variance  
202 observed (9, 10). Using random forest we found no significant difference in the AUC of baseline auxology alone  
203 compared to using blood transcriptome alone in either GHD or TS (all ~90%). It should be noted that this  
204 comparison was with the transcriptome shared between GHD and TS and if the full blood transcriptome is  
205 used then the average AUC is significantly higher than that derived from baseline auxology (average AUC ~90%  
206 compared to ~95%). We recognise that further work would need to be done to refine a smaller number of  
207 genes and therefore minimise the risk of overfitting when using the full blood transcriptome. However, we did

208 identify a significant boost to prediction of between 4% and 7% when the transcriptomic signature shared  
209 between GHD and TS was combined with the baseline patient auxology. Importantly the gain in prediction was  
210 combined with an average halving of the error rate, a feature that represents a major clinical advance in the  
211 prediction of response to r-hGH.

212 This work has led to three novel findings relevant to growth studies, and potentially to other therapeutic areas  
213 in paediatrics. First, this study has demonstrated the utility of whole blood transcriptome in the classification  
214 of growth response in GHD and TS, derived from a baseline blood sample which is straightforward to obtain  
215 in any child. This technique may be of particular use in conditions with marked variability in response to r-hGH  
216 such as the short child born small for gestational age. Second, network analysis provides a novel approach that  
217 can be used to identify genomic features that are likely to have high predictive value. Finally, a set of common  
218 genes in GHD and TS identified by a network approach can be used to classify growth response in both  
219 conditions, providing the opportunity to develop a test to inform clinical management.

220

221

222

223

224

225

226

227

228

229

230

231

232

233

234 **Methods**

235

236 Patients

237 The PREDICT Long Term Follow up study (multicentre, open-label, prospective, phase IV) and the  
238 pharmacogenetics of the first year of r-hGH treatment have been described extensively previously (7, 29).  
239 Briefly, pre-pubertal children with GHD and TS were enrolled. A diagnosis of GHD was reached following two  
240 pharmacological stimulation tests with a peak GH concentration of < 10µg/L. Prior to enrolment in the study  
241 none of the children had received GH therapy. Children with GHD due to central nervous system tumours or  
242 radiotherapy were excluded but children born small for gestational age were not. The diagnosis of TS was  
243 based on karyotype.

244 This PREDICT study was conducted in compliance with ethical principles based on the Declaration of Helsinki,  
245 the International Conference on Harmonization Tripartite Guideline for Good Clinical Practice, and all  
246 applicable regulatory requirements.

247

248 Genetic Analysis

249 A total of 1219 genetic markers were used in the analysis, 1217 Illumina-genotyped single nucleotide  
250 polymorphisms (SNPs) corresponding to a candidate list of 103 genes and 2 TaqMan-genotyped SNPs in the  
251 *IGFBP3* promoter. All genes selected are known to be involved in growth regulation and GH action as  
252 previously described (5, 7).

253 A Kruskal-Wallis rank sum test was applied on the following 3 genetic models **a)** genotypic (AA, AB, BB); **b)**  
254 dominant (AA/AB+BB) and; **c)** recessive (AA+AB/BB). For non-pseudoautosomal X chromosome markers, GHD  
255 boys and TS girls were analysed as having only two homozygote categories (AA/BB). Adjustment for multiple  
256 testing was performed using Bonferroni correction with 2 different parameters as the number of independent  
257 tests, the number of Linkage Disequilibrium (LD) blocks in the gene in which the SNP is contained and the total  
258 number of LD blocks present in all genes (768 in GHD and 563 in TS). Filtering criterion for prediction were  
259 defined as a false discovery rate [FDR] modified p-value <0.05 unmodified for linkage disequilibrium blocks.

260

261 Transcriptome Analysis

262 Transcriptomic profiling was carried out on whole blood RNA as described previously (7) using Affymetrix  
263 GeneChip Human Genome U133 plus 2.0 Arrays. For background correction, the Robust Multichip Average  
264 (RMA) was applied with quantile normalisation and a mean probe set summarisation using Qlucore Omics  
265 Explorer 2.3 (Qlucore, Lund, Sweden). The data set generated was subject to quality control to investigate the  
266 presence of outliers and further confounding effects.

267 Baseline gene expression associations with height velocity in each year of growth response were determined  
268 using rank regression with microarray batch, age, body mass index (BMI) at baseline as covariates for both  
269 GHD and TS patients along with gender and peak GH test response (average of two provocative tests) for the  
270 GHD patients. Over the study a number of children either entered puberty spontaneously or received  
271 exogenous sex steroids for pubertal induction. We therefore introduced a further normalisation for Tanner  
272 stage to the analysis to account for the proportion of children entering puberty in each year of the study.

273

274 Generation of network models

275 Network analysis allows the identification and prioritisation of key functional elements within interactome  
276 models. To derive an interactome model differentially expressed genes were used as “seeds” and all known  
277 protein:protein interactions between the seeds and their inferred immediate neighbours were calculated to  
278 generate a biological network using the output of the Biogrid model of the human Interactome (3.3.122)(32).  
279 Network generation and processing was performed using Cytoscape 2.8.3(33).

280

281 Analysis of Gene Network Models

282 Clustering and “community structure” of modules within biological networks arise from variation in  
283 connectivity within the network and are known to be associated with function (27, 34). To rank these  
284 functional components within interactome models we used the ModuLand plugin for Cytoscape 2.8.3 to  
285 determine overlapping modules and to identify hierarchical structure using the centrality property thus  
286 enabling the identification of key network elements (35). The central core unit of each network module

287 (metanode) was defined as the ten most central genes. A list of the unique genes in each metanode was  
288 generated and used as a model of the functional core of the associated network for further comparison.  
289 Network topology was analysed using the CytoHubba plugin for Cytoscape (36). The String database was used  
290 to assess the integrity and connectivity of gene modules (37).

291

### 292 Analysis of epigenomic data

293 Epigenomic data from the whole genome DNA previously published methylation profiles of six GHD patients  
294 was used to assess the relationship of changes in DNA methylation in relation to response to r-hGH (21). The  
295 data from GSE57107 was re-analysed in Qlucore Omics Explorer 3.3 and a median based gene level summary  
296 of methylation was determined (n=20618). The relationship between gene level DNA methylation and  
297 response to r-hGH was determined using rank regression.

298

### 299 Classification of Growth Response

300 All analysis was performed using the statistical software R 3.3.2 (38). The relationship of baseline gene  
301 expression to potential predictive value (classification of low and high quartiles of response) was performed  
302 using Discriminant Analysis of Principal Components (DAPC) (39), Partial Least Squares Discriminant Analysis  
303 (PLS-DA) (mixOmics 6.1.1 R package (40)) and random forest with 1000 trees (41). Class size imbalance was  
304 corrected for using Synthetic Minority Oversampling Technique (SMOTE) (42). Feature selection from random  
305 forest data was performed using the BORUTA algorithm (43). The area under the curve of the receiver  
306 operating characteristic (AUC) was used to present the probability of a randomly selected sample being  
307 classified correctly.

308 In random forests about one third of the cases are left out of each iteration and can be used as a test set to  
309 perform cross-validation and to get an unbiased estimate of the test set error, the out of bag (oob) error  
310 estimate. The oob error estimate is recognised as being unbiased (41).

311 We used random forest to investigate whether blood transcriptomic data from GHD and TS patients provided  
312 additional value for prediction of response to r-hGH based on baseline patient auxology (age, weight SDS,  
313 birthweight SDS and distance to target height SDS in both TS and GHD with the addition of peak GH value for  
314 GH provocation test in GHD). These analyses were performed by defining the predictive value of baseline  
315 clinical phenotype alone and these data were then compared to baseline clinical phenotype in addition to  
316 blood transcriptomic markers.

317

### 318 Statistics

319 Analyses were performed to determine genetic associations with response to r-hGH using the Kruskal-Wallis  
320 rank-sum test with Bonferroni corrections for false discovery rate (FDR).

321 Transcriptomic data was subjected to dimensional scaling using Principal Components Analysis (PCA) and Iso-  
322 map multidimensional scaling (MDS) (44) and used to demonstrate data homogeneity (Qlucore Omics Explorer  
323 3.3) along with outliers using cross-validation. Unsupervised analysis of transcriptome data was performed  
324 using a projection score to select optimal variable subsets by variance filtering (45).

325 Transcriptomic associations with response to r-hGH were performed using rank regression ( $p < 0.01$ ) and  
326 modified for the listed covariates. This was done by fitting a linear model with the factors to be eliminated as  
327 predictors, and retaining only the residuals (i.e. subtracting the part explained by the predictors). When a  
328 nominal factor was used as covariate (such as gender), this is equivalent to mean-centring each variable over  
329 each subgroup defined by the factor.

330 The significance of gene set overlaps derived from the network analysis was determined using the  
331 hypergeometric test. Analyses were performed in the stated software or using R (38).

332

### 333 Study approval.

334 The PREDICT (NCT00256126) and PREDICT long-term follow-up (NCT00699855) studies were approved by the  
335 Scotland Medical Research and Ethics Committee (reference 05/MRE10/61) and the North West Research

336 Ethics Committee (reference 08/H1010/77), respectively. Informed consent was obtained from parents for all  
337 study participants.

338

### 339 **List of Supplementary Materials**

#### 340 **Supplement Tables.xlsx**

341 **Supplemental Table S1A.** Association of SNPs with growth response endpoints in GHD and TS.

342 **Supplemental Table S1B-D.** Gene level single nucleotide polymorphism (SNP) associations with growth  
343 response endpoints in growth hormone deficiency (GHD) and Turner syndrome (TS).

344 **Supplemental Table S2.** Transcriptomic associations with height velocity growth response endpoints at each  
345 year of the study.

346 **Supplemental Table S3.** Predictive value of whole blood gene expression associated with response to  
347 recombinant human growth hormone (r-hGH) in patients with growth hormone deficiency (GHD) and Turner  
348 syndrome (TS).

349 **Supplemental Table S4.** Interactome models of transcriptomic data associated with height velocity growth  
350 response endpoints at each year of the study.

351 **Supplemental Table S5.** Gene level SNP associations mapped to network properties of the interactome models  
352 of height velocity related gene expression.

353 **Supplemental Table S6.** Predictive value of an identical set of blood gene expression markers identified by  
354 network analysis in the classification of response to recombinant human growth hormone (r-hGH) in patients  
355 with growth hormone deficiency (GHD) and Turner syndrome (TS).

356 **Supplemental Table S7.** Overlap between GHD and TS interactome models at each year of therapy with r-  
357 hGH.

358 **Supplemental Table S8.** Comparison of the prediction of growth response using clinical phenotype with and  
359 without transcriptomic data.

360

361

362 **References:**

- 363 1. National Institute for Health and Care Excellence (NICE), Human growth hormone (somatropin) for the  
364 treatment of growth failure in children. (2010).
- 365 2. M. B. Ranke, A. Lindberg, M. Brosz, S. Kaspers, J. Loftus, H. Wollmann, M. Koltowska-Haggstrom, M. Roelants,  
366 Accurate long-term prediction of height during the first four years of growth hormone treatment in  
367 prepubertal children with growth hormone deficiency or Turner Syndrome. *Horm Res Paediatr* **78**, 8-17 (2012).
- 368 3. A. Stevens, C. De Leonibus, D. Hanson, A. Whatmore, P. Murray, R. Donn, S. Meyer, P. Chatelain, P. Clayton,  
369 Pediatric perspective on pharmacogenomics. *Pharmacogenomics* **14**, 1889-1905 (2013).
- 370 4. A. Stevens, C. De Leonibus, A. Whatmore, D. Hanson, P. Murray, P. Chatelain, M. Westwood, P. Clayton,  
371 Pharmacogenomics related to growth disorders. *Horm Res Paediatr* **80**, 477-490 (2013).
- 372 5. A. Stevens, P. Murray, J. Wojcik, J. Raelson, E. Koledova, P. Chatelain, P. Clayton, P. I. Group, Validating genetic  
373 markers of response to recombinant human growth hormone in children with growth hormone deficiency and  
374 Turner syndrome: the PREDICT validation study. *Eur J Endocrinol* **175**, 633-643 (2016).
- 375 6. C. De Leonibus, P. Chatelain, C. Knight, P. Clayton, A. Stevens, Effect of summer daylight exposure and genetic  
376 background on growth in growth hormone-deficient children. *Pharmacogenomics J* **16**, 540-550 (2016).
- 377 7. P. Clayton, P. Chatelain, L. Tato, H. W. Yoo, G. R. Ambler, A. Belgorosky, S. Quinteiro, C. Deal, A. Stevens, J.  
378 Raelson, P. Croteau, B. Destenaves, C. Olivier, A pharmacogenomic approach to the treatment of children with  
379 GH deficiency or Turner syndrome. *Eur J Endocrinol* **169**, 277-289 (2013).
- 380 8. A. Stevens, D. Hanson, A. Whatmore, B. Destenaves, P. Chatelain, P. Clayton, Human growth is associated with  
381 distinct patterns of gene expression in evolutionarily conserved networks. *BMC Genomics* **14**, 547 (2013).
- 382 9. M. B. Ranke, A. Lindberg, P. Chatelain, P. Wilton, W. Cutfield, K. Albertsson-Wikland, D. A. Price, Derivation and  
383 validation of a mathematical model for predicting the response to exogenous recombinant human growth  
384 hormone (GH) in prepubertal children with idiopathic GH deficiency. KIGS International Board. Kabi Pharmacia  
385 International Growth Study. *The Journal of Clinical Endocrinology and Metabolism* **84**, 1174-1183 (1999).
- 386 10. M. B. Ranke, A. Lindberg, P. Chatelain, P. Wilton, W. Cutfield, K. Albertsson-Wikland, D. A. Price, Prediction of  
387 long-term response to recombinant human growth hormone in Turner syndrome: development and validation  
388 of mathematical models. KIGS International Board. Kabi International Growth Study. *The Journal of Clinical*  
389 *Endocrinology and Metabolism* **85**, 4212-4218 (2000).



- 390 11. M. B. Ranke, A. Lindberg, P. Chatelain, P. Wilton, W. Cutfield, K. Albertsson-Wikland, D. A. Price, Predicting the  
391 response to recombinant human growth hormone in Turner syndrome: KIGS models. KIGS International Board.  
392 Kabi International Growth Study. *Acta Paediatr Suppl* **88**, 122-125 (1999).
- 393 12. A. Stevens, C. Bonshek, A. Whatmore, I. Butcher, D. Hanson, C. De Leonibus, G. Shaikh, M. Brown, E. O'Shea, S.  
394 Victor, P. Powell, P. Settle, B. Padmakumar, A. Tan, E. Odeka, C. Cooper, J. Birch, A. Shenoy, M. Westwood, L.  
395 Patel, B. W. Dunn, P. Clayton, Insights into the pathophysiology of catch-up compared with non-catch-up  
396 growth in children born small for gestational age: an integrated analysis of metabolic and transcriptomic data.  
397 *Pharmacogenomics J* **14**, 376-384 (2014).
- 398 13. C. De Leonibus, P. Chatelain, C. Knight, P. Clayton, A. Stevens, Effect of summer daylight exposure and genetic  
399 background on growth in growth hormone-deficient children. *Pharmacogenomics J*, (2015).
- 400 14. T. Gerber, E. Willscher, H. Loeffler-Wirth, L. Hopp, D. Schadendorf, M. Scharl, U. Anderegg, G. Camp, B.  
401 Treutlein, H. Binder, M. Kunz, Mapping heterogeneity in patient-derived melanoma cultures by single-cell RNA-  
402 seq. *Oncotarget* **8**, 846-862 (2017).
- 403 15. M. Grigoriou, R. Tagett, S. Draghici, S. Dima, A. Nastase, R. Florea, A. Sorop, V. Ilie, N. Bacalbasa, V. Tica, V.  
404 Laszlo, A. Mansuet-Lupo, D. Damotte, W. Klepetko, I. Popescu, J. F. Regnard, Gene-expression Profiling in Non-  
405 small Cell Lung Cancer with Invasion of Mediastinal Lymph Nodes for Prognosis Evaluation. *Cancer Genomics &*  
406 *Proteomics* **12**, 231-242 (2015).
- 407 16. F. M. G. Cavalli, M. Remke, L. Rampasek, J. Peacock, D. J. H. Shih, B. Luu, L. Garzia, J. Torchia, C. Nor, A. S.  
408 Morrissy, S. Agnihotri, Y. Y. Thompson, C. M. Kuzan-Fischer, H. Farooq, K. Isaev, C. Daniels, B. K. Cho, S. K. Kim,  
409 K. C. Wang, J. Y. Lee, W. A. Grajkowska, M. Perek-Polnik, A. Vasiljevic, C. Faure-Conter, A. Jouvett, C. Giannini, A.  
410 A. Nageswara Rao, K. K. W. Li, H. K. Ng, C. G. Eberhart, I. F. Pollack, R. L. Hamilton, G. Y. Gillespie, J. M. Olson, S.  
411 Leary, W. A. Weiss, B. Lach, L. B. Chambless, R. C. Thompson, M. K. Cooper, R. Vibhakar, P. Hauser, M. C. van  
412 Veelen, J. M. Kros, P. J. French, Y. S. Ra, T. Kumabe, E. Lopez-Aguilar, K. Zitterbart, J. Sterba, G. Finocchiaro, M.  
413 Massimino, E. G. Van Meir, S. Osuka, T. Shofuda, A. Klekner, M. Zollo, J. R. Leonard, J. B. Rubin, N. Jabado, S.  
414 Albrecht, J. Mora, T. E. Van Meter, S. Jung, A. S. Moore, A. R. Hallahan, J. A. Chan, D. P. C. Tirapelli, C. G.  
415 Carlotti, M. Fouladi, J. Pimentel, C. C. Faria, A. G. Saad, L. Massimi, L. M. Liau, H. Wheeler, H. Nakamura, S. K.  
416 Elbabaa, M. Perezpena-Diazconti, F. Chico Ponce de Leon, S. Robinson, M. Zapotocky, A. Lassaletta, A. Huang,  
417 C. E. Hawkins, U. Tabori, E. Bouffet, U. Bartels, P. B. Dirks, J. T. Rutka, G. D. Bader, J. Reimand, A. Goldenberg,

- 418 V. Ramaswamy, M. D. Taylor, Intertumoral Heterogeneity within Medulloblastoma Subgroups. *Cancer Cell* **31**,  
419 737-754 e736 (2017).
- 420 17. M. Bhutani, Q. Zhang, R. Friend, P. M. Voorhees, L. J. Druhan, B. Barlogie, P. Sonneveld, G. J. Morgan, J. T.  
421 Symanowski, B. R. Avalos, E. A. Copelan, S. Z. Usmani, Investigation of a gene signature to predict response to  
422 immunomodulatory derivatives for patients with multiple myeloma: an exploratory, retrospective study using  
423 microarray datasets from prospective clinical trials. *The Lancet. Haematology* **4**, e443-e451 (2017).
- 424 18. H. F. M. Kamel, H. Al-Amodi, Exploitation of Gene Expression and Cancer Biomarkers in Paving the Path to Era  
425 of Personalized Medicine. *Genomics Proteomics Bioinformatics* **15**, 220-235 (2017).
- 426 19. M. B. Ranke, A. Lindberg, Predicting growth in response to growth hormone treatment. *Growth Horm IGF Res*  
427 **19**, 1-11 (2009).
- 428 20. Y. Tuo, N. An, M. Zhang, Feature genes in metastatic breast cancer identified by MetaDE and SVM classifier  
429 methods. *Molecular Medicine Reports* **17**, 4281-4290 (2018).
- 430 21. J. Kolarova, O. Ammerpohl, J. Gutwein, M. Welzel, I. Baus, F. G. Riepe, T. Eggermann, A. Caliebe, P. M.  
431 Holterhus, R. Siebert, S. Bens, In vivo investigations of the effect of short- and long-term recombinant growth  
432 hormone treatment on DNA-methylation in humans. *PLoS One* **10**, e0120463 (2015).
- 433 22. M. B. Ranke, J. M. Wit, Growth hormone - past, present and future. *Nat Rev Endocrinol* **14**, 285-300 (2018).
- 434 23. J. M. Wit, M. B. Ranke, K. Albertsson-Wikland, A. Carrascosa, R. G. Rosenfeld, S. Van Buuren, B. Kristrom, E.  
435 Schoenau, L. Audi, A. C. Hokken-Koelega, P. Bang, H. Jung, W. F. Blum, L. A. Silverman, P. Cohen, S. Cianfarani,  
436 C. Deal, P. E. Clayton, L. de Graaff, J. Dahlgren, J. Kleintjens, M. Roelants, Personalized approach to growth  
437 hormone treatment: clinical use of growth prediction models. *Horm Res Paediatr* **79**, 257-270 (2013).
- 438 24. M. B. Ranke, R. Schweizer, D. D. Martin, S. Eehalt, C. P. Schwarze, F. Serra, G. Binder, Analyses from a centre  
439 of short- and long-term growth in Turner's syndrome on standard growth hormone doses confirm growth  
440 prediction algorithms and show normal IGF-I levels. *Horm Res Paediatr* **77**, 214-221 (2012).
- 441 25. A. Valsesia, P. Chatelain, A. Stevens, V. A. Peterkova, A. Belgorosky, M. Maghnie, F. Antoniazzi, E. Koledova, J.  
442 Wojcik, P. Farmer, B. Destenaves, P. Clayton, P. I. group, GH deficiency status combined with GH receptor  
443 polymorphism affects response to GH in children. *Eur J Endocrinol* **173**, 777-789 (2015).
- 444 26. A. Stevens, C. De Leonibus, D. Hanson, A. W. Dowsey, A. Whatmore, S. Meyer, R. P. Donn, P. Chatelain, I.  
445 Banerjee, K. E. Cosgrove, P. E. Clayton, M. J. Dunne, Network analysis: a new approach to study endocrine  
446 disorders. *Journal of Molecular Endocrinology* **52**, R79-93 (2014).

- 447 27. J. Sun, Z. Zhao, A comparative study of cancer proteins in the human protein-protein interaction network. *BMC*  
448 *Genomics* **11 Suppl 3**, S5 (2010).
- 449 28. I. A. Kovacs, R. Palotai, M. S. Szalay, P. Csermely, Community landscapes: an integrative approach to determine  
450 overlapping network module hierarchy, identify key nodes and predict network dynamics. *PLoS One* **5**, (2010).
- 451 29. A. Stevens, P. Clayton, L. Tato, H. W. Yoo, M. D. Rodriguez-Arno, J. Skorodok, G. R. Ambler, M. Zignani, J.  
452 Zieschang, G. Della Corte, B. Destenaves, A. Champigneulle, J. Raelson, P. Chatelain, Pharmacogenomics of  
453 insulin-like growth factor-I generation during GH treatment in children with GH deficiency or Turner syndrome.  
454 *Pharmacogenomics J* **14**, 54-62 (2014).
- 455 30. J. Kolarova, O. Ammerpohl, J. Gutwein, M. Welzel, I. Baus, F. G. Riepe, T. Eggermann, A. Caliebe, P.-M.  
456 Holterhus, R. Siebert, S. Bens, In vivo Investigations of the Effect of Short- and Long-Term Recombinant Growth  
457 Hormone Treatment on DNA-Methylation in Humans. *PLOS ONE* **10**, e0120463 (2015).
- 458 31. D. Chicco, Ten quick tips for machine learning in computational biology. *BioData Min* **10**, 35 (2017).
- 459 32. A. Chatr-Aryamontri, B. J. Breitkreutz, R. Oughtred, L. Boucher, S. Heinicke, D. Chen, C. Stark, A. Breitkreutz, N.  
460 Kolas, L. O'Donnell, T. Reguly, J. Nixon, L. Ramage, A. Winter, A. Sellam, C. Chang, J. Hirschman, C. Theesfeld, J.  
461 Rust, M. S. Livstone, K. Dolinski, M. Tyers, The BioGRID interaction database: 2015 update. *Nucleic Acids Res*  
462 **43**, D470-478 (2015).
- 463 33. M. E. Smoot, K. Ono, J. Ruscheinski, P. L. Wang, T. Ideker, Cytoscape 2.8: new features for data integration and  
464 network visualization. *Bioinformatics (Oxford, England)* **27**, 431-432 (2011).
- 465 34. H. Yu, P. M. Kim, E. Sprecher, V. Trifonov, M. Gerstein, The importance of bottlenecks in protein networks:  
466 correlation with gene essentiality and expression dynamics. *PLoS Comput Biol* **3**, e59 (2007).
- 467 35. M. Szalay-Beko, R. Palotai, B. Szappanos, I. A. Kovacs, B. Papp, P. Csermely, ModuLand plug-in for Cytoscape:  
468 determination of hierarchical layers of overlapping network modules and community centrality. *Bioinformatics*  
469 *(Oxford, England)* **28**, 2202-2204 (2012).
- 470 36. C. H. Chin, S. H. Chen, H. H. Wu, C. W. Ho, M. T. Ko, C. Y. Lin, cytoHubba: identifying hub objects and sub-  
471 networks from complex interactome. *BMC Syst Biol* **8 Suppl 4**, S11 (2014).
- 472 37. D. Szklarczyk, A. Franceschini, S. Wyder, K. Forslund, D. Heller, J. Huerta-Cepas, M. Simonovic, A. Roth, A.  
473 Santos, K. P. Tsafou, M. Kuhn, P. Bork, L. J. Jensen, C. von Mering, STRING v10: protein-protein interaction  
474 networks, integrated over the tree of life. *Nucleic Acids Res* **43**, D447-452 (2015).

- 475 38. RCoreTeam, R: A language and environment for statistical computing. *R Foundation for Statistical Computing*,  
476 Vienna, Austria <https://www.R-project.org/>, (2016).
- 477 39. T. Jombart, S. Devillard, F. Balloux, Discriminant analysis of principal components: a new method for the  
478 analysis of genetically structured populations. *BMC Genet* **11**, 94 (2010).
- 479 40. F. Rohart, B. Gautier, A. Singh, K. A. Le Cao, mixOmics: An R package for 'omics feature selection and multiple  
480 data integration. *PLoS Comput Biol* **13**, e1005752 (2017).
- 481 41. A. W. Liaw, M., Classification and Regression by randomForest. *R News* **2**, 18-22 (2002).
- 482 42. N. V. Chawla, K. W. Bowyer, L. O. Hall, W. P. Kegelmeyer, SMOTE: Synthetic minority over-sampling technique.  
483 *Journal of Artificial Intelligence Research* **16**, 321-357 (2002).
- 484 43. M. B. Kursa, W. R. Rudnicki, Feature Selection with the Boruta Package. *J Stat Softw* **36**, 1-13 (2010).
- 485 44. J. Nilsson, T. Fioretos, M. Hoglund, M. Fontes, Approximate geodesic distances reveal biologically relevant  
486 structures in microarray data. *Bioinformatics (Oxford, England)* **20**, 874-880 (2004).
- 487 45. M. Fontes, C. Soneson, The projection score--an evaluation criterion for variable subset selection in PCA  
488 visualization. *BMC Bioinformatics* **12**, 307 (2011).

## 489 **Acknowledgements**

490 The following were PREDICT local centre principal investigators who enrolled patients into the study:

491 Yang, S-W; Yoo, H-W; Wang, T-J; Cabrol, S; Weill, J; Pfaeffle, R; Antoniazzi, F; Pilotta, A; Veimo, D; Peterkova,  
492 V; Ferrandez Longas, A; Gonzalez, I; Quinteiro, S; Rodriguez Arnao, M; Bath, L; Colle, M; Brusquet, Y.

## 493 **Author Contributions**

494 PEC and PC conceived and designed the PREDICT project and this study. Data analysis and methodology  
495 development were undertaken by AS, PGM, TG and CDL. The manuscript was written by AS and PGM and  
496 revised by EK, PC, and PEC. EK, GA, JH, KK, JPS, GB, MM, SZ, EB, JS, DY, AB, JPLS, RC, EVH, LH, JD, CD all  
497 contributed to the clinical data analysis. All authors reviewed the final manuscript.

## 498 **Disclosures**

499 AS and PM have received speaker honoraria from Merck KGaA, Darmstadt, Germany. PCh has received  
500 investigator research support, consultant and speaker honoraria from Merck KGaA, Darmstadt, Germany. PCI

501 had received research investigator support and speaker honoraria from Merck KGaA, Darmstadt, Germany. EK  
502 is an employee of Merck KGaA, Darmstadt, Germany.

503 **Data**

504 All transcriptomic data will be available from Gene Expression Omnibus (GEO) and is currently in submission.

505 Most of the GHD patient transcriptomic data is already available from GEO - GSE72439.

506

507

508

509

510

511

512

513

514

515

516

517

518

519

520

521

522

523

524

525 **Tables:**

**A**

| Condition  | Height Velocity<br>at year of treatment | Mean<br>( $\pm$ standard deviation) | Median<br>(min, max) | N  |
|------------|-----------------------------------------|-------------------------------------|----------------------|----|
| <b>GHD</b> | <b>HV1</b>                              | 8.9( $\pm$ 2.1)                     | 8.7 (4.7, 14.3)      | 71 |
|            | <b>HV2</b>                              | 7.4 ( $\pm$ 1.6)                    | 7.1 (3.4, 12.2)      | 65 |
|            | <b>HV3</b>                              | 6.6 ( $\pm$ 2.0)                    | 6.5 (2.0, 11.4)      | 65 |
|            | <b>HV4</b>                              | 6.1 ( $\pm$ 2.3)                    | 6.2 (0.9, 11.6)      | 60 |
|            | <b>HV5</b>                              | 5.1 ( $\pm$ 2.3)                    | 5.2 (0.0, 10.8)      | 53 |
| <b>TS</b>  | <b>HV1</b>                              | 7.6 ( $\pm$ 1.4)                    | 7.2 (5.3, 11.7)      | 43 |
|            | <b>HV2</b>                              | 6.0 ( $\pm$ 1.1)                    | 6.1 (3.3, 8.0)       | 31 |
|            | <b>HV3</b>                              | 5.3 ( $\pm$ 1.5)                    | 5.0 (1.9, 8.2)       | 40 |
|            | <b>HV4</b>                              | 4.7 ( $\pm$ 1.8)                    | 4.8 (1.1, 8.1)       | 41 |
|            | <b>HV5</b>                              | 3.7 ( $\pm$ 1.6)                    | 3.9 (1.0, 7.4)       | 33 |

526 Height velocity (HV) at each year of therapy (cm/year), min = minimum value, max = maximum value, N = sample size (data were not available on all children at each year after the first year)

**B**

| Clinical Characteristics      | GHD (N=70)        | TS (N=43)         |
|-------------------------------|-------------------|-------------------|
| Male                          | 45 (64.3)*        | 0 (0.0)*          |
| Female                        | 25 (35.7)*        | 43 (100)*         |
| Age at baseline (years)       | 9.3 (6.0, 11.2)   | 9.9 (7.2, 11.8)   |
| Baseline height SDS           | -2.1 (-2.5, -1.7) | -2.5 (-3.2, -1.9) |
| Baseline BMI SDS              | -0.2 (-0.9, 0.3)  | 0.4 (-0.3, 1.2)   |
| MPH SDS                       | -0.7 (-1.5, 0.0)  | -0.1 (-0.9, 0.6)  |
| GH peak response ( $\mu$ g/L) | 3.9 (2.3, 5.6)    | -                 |

527 Data are n (%) or median (Quartile 1, Quartile 3). \*All were Tanner Stage 1 at baseline. BMI, body  
528 mass index; GH, growth hormone; GHD, growth hormone deficiency; TS, Turner syndrome; MPH,  
mid-parental height; SDS, standard deviation score.

529 **Table 1. Patient characteristics. A)** Growth response endpoints used over the duration of the study and **B)**  
530 baseline auxology for patients with growth hormone deficiency (GHD) and Turner Syndrome treated with  
531 recombinant human growth hormone (r-hGH).

532 **Figures**

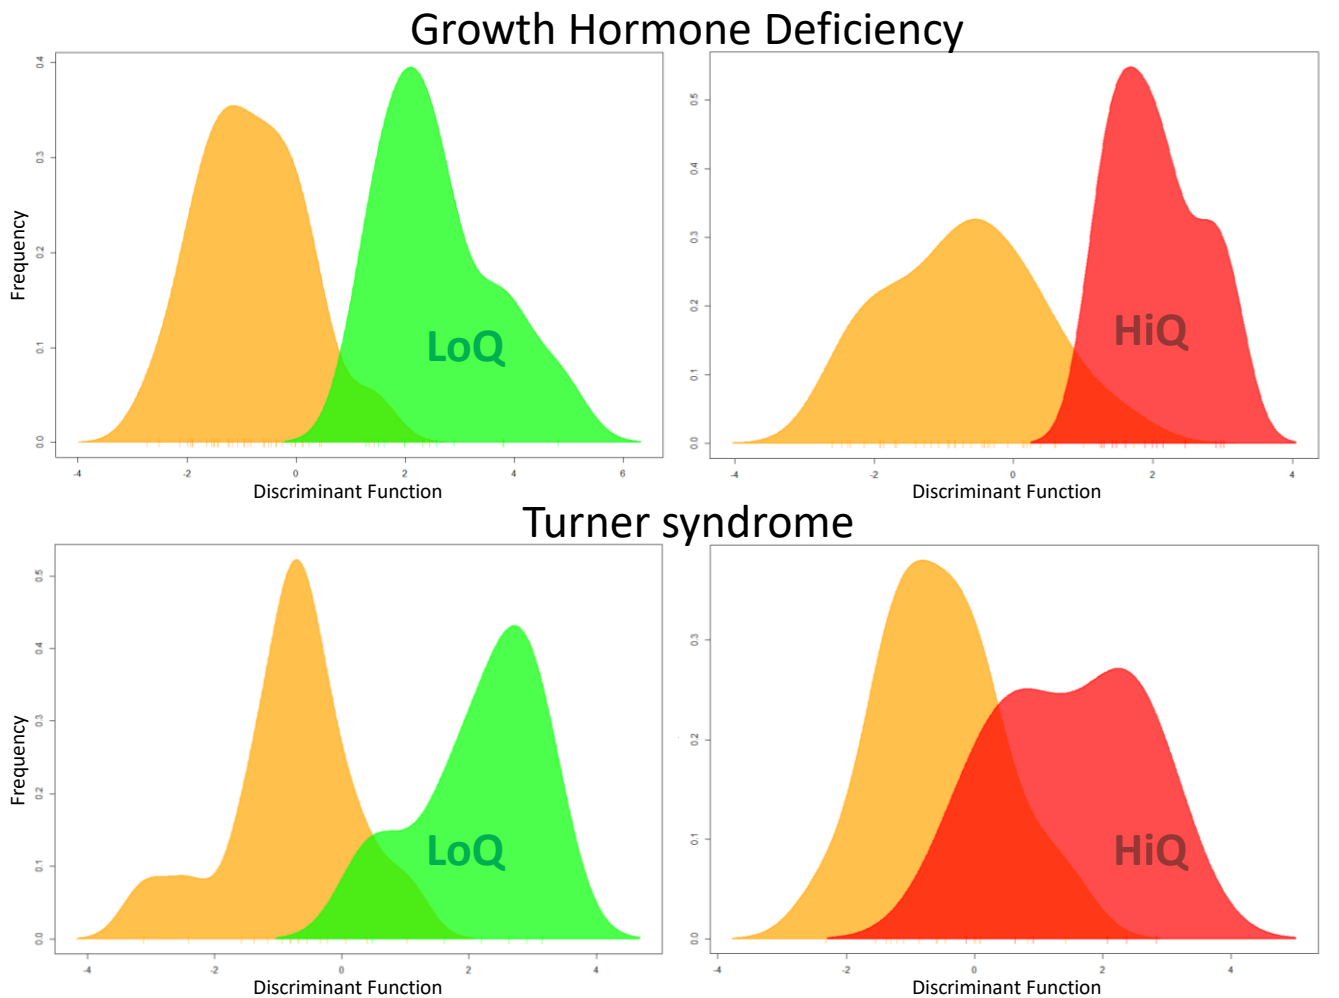

533 **Figure 1. The association of whole blood gene expression at baseline with response to recombinant human**  
534 **growth hormone (r-hGH) over all five years of therapy in patients with growth hormone deficiency (GHD)**  
535 **and Turner syndrome (TS). Comparison of patient response to r-hGH using Discriminant Analysis of Principal**  
536 **Components (DAPC). Low quartile (green, LoQ) and high quartile (red, HiQ) of growth response over five years**  
537 **of therapy (cms grown) compared to the remaining patients (orange) in GHD (N= 50) and TS (N=22).**  
538 **Unsupervised transcriptomic data with no normalisation for phenotype are shown, GHD = 8875 & TS = 8455**  
539 **gene probesets. DAPC generates a discriminant function, a synthetic variable that optimises the variation**  
540 **between the groups whilst minimising the variation within a group. The frequency of the discriminant function**  
541 **of DAPC is plotted.**

542

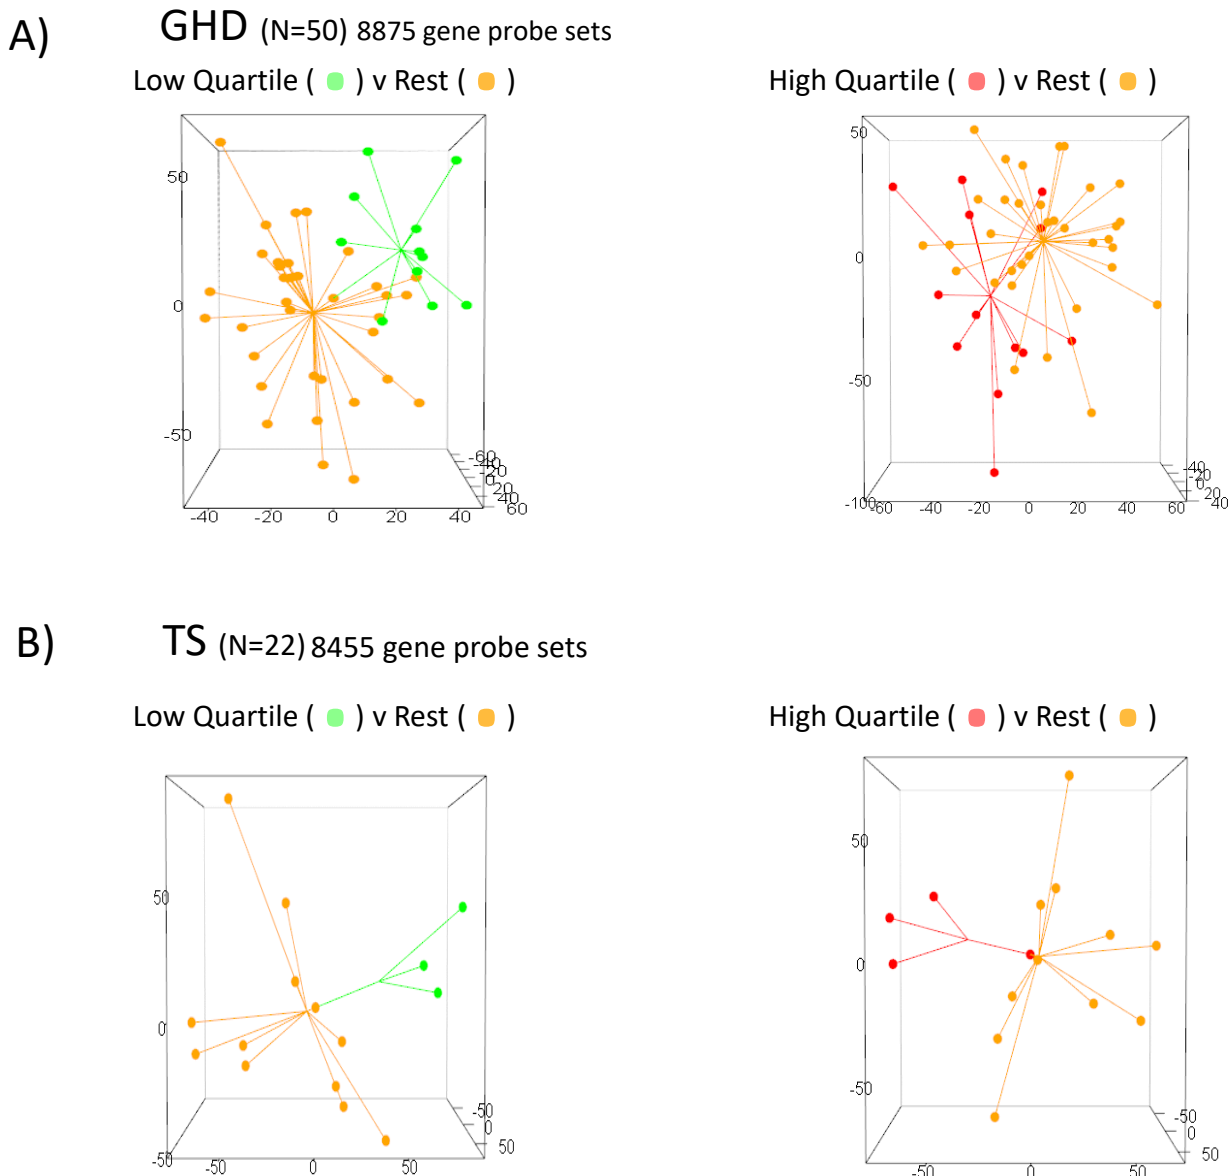

543 **Figure 2. Whole blood gene expression is associated with response to recombinant human growth hormone**  
544 **(r-hGH) over five years of therapy in patients with growth hormone deficiency (GHD) and Turner syndrome**  
545 **(TS).** Partial least squares discriminant analysis (PLS-DA) of unsupervised transcriptome using three  
546 components. The low and high quartiles of growth response are shown for response to r-hGH (cm) over five  
547 years in **A) GHD** and **B) TS**. Star plot shows sample distance from the centroid, the arithmetic mean position  
548 of all the points in each group.

549



### GHD

### TS

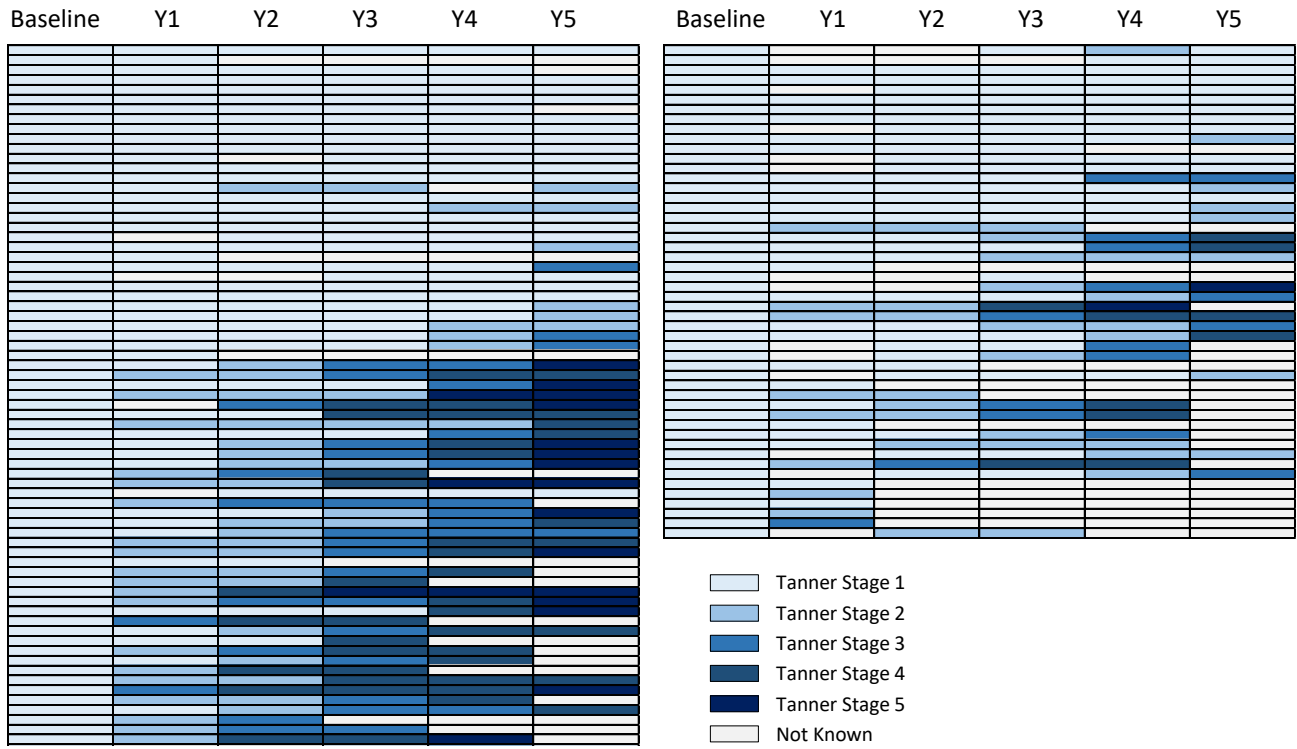

550

551 **Figure 3. Distribution of Tanner stages over the study duration.** Heat map of the Tanner stage of each patient  
552 (row) ordered by age (youngest at top). Y = year of study.

553

554

555

556

557

558

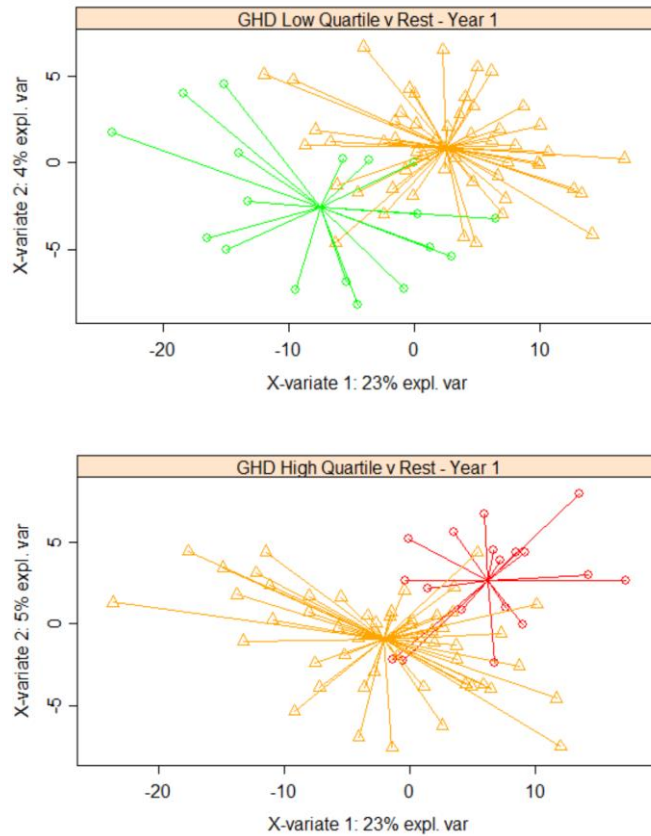

559  
560  
561  
562  
563  
564  
565  
566  
567

568 **Figure 4. Predictive value of whole blood gene expression associated with response to recombinant human**  
569 **growth hormone (r-hGH) in patients with growth hormone deficiency (GHD).** Classification of low quartile  
570 (LoQ) and high quartile (HiQ) of growth response (height velocity, cm/year) over each of five years of therapy  
571 with r-hGH (Y1-Y5) was performed in GHD patients and TS patients. Gene expression associated with growth  
572 response was determined using rank regression ( $p < 0.01$ ) and Partial least squares discriminant analysis (PLS-  
573 DA) with two components (X-variate 1 & 2) was used to visualise response groups; PLS-DA is an analytical  
574 approach that determines the similarity between individual patients whilst maximising the difference between  
575 patient groups. Low quartile (green) and high quartile (red) compared to the rest of the data (orange) is shown  
576 for first year growth response to r-hGH in GHD ( $N = 71$ , 330 gene probesets with rank regression  $p < 0.01$ ).  
577 Similarity between samples is represented by their proximity. The star plot shows sample distance from the  
578 centroid, the arithmetic mean position of all the points in each group.

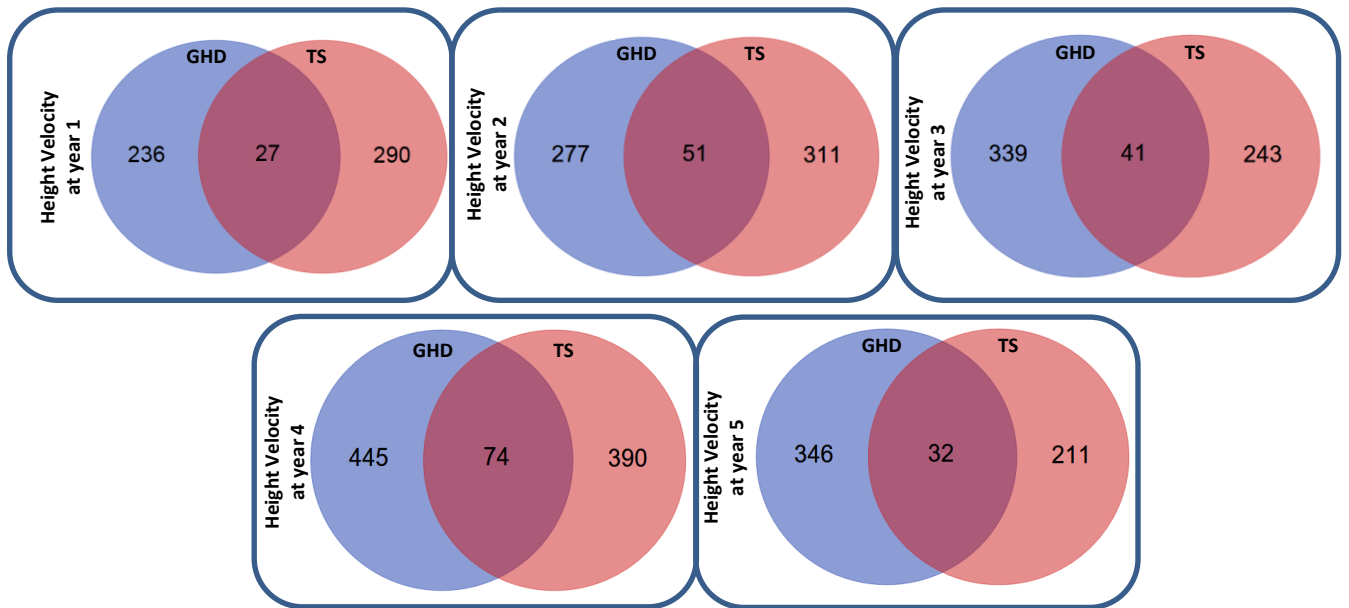

579

580 **Figure 5. Overlap of the core interactome models of height velocity related gene expression in GHD and TS.**

581 Interactome models were generated from the gene expression associated ( $p < 0.01$ ) with the height velocity at  
582 each year of the study. The functional hierarchy of gene interaction modules within the interactome models  
583 was determined using the Moduland algorithm and the core of the interactome model was defined as the  
584 unique sum of the top ten elements of the modules as ranked by network centrality. The overlap of the core  
585 of the interactome models between GHD and TS was then determined and visualised as a Venn diagram.

586

587

588

589

590

591

592

593  
594  
595  
596  
597  
598  
599  
600  
601  
602  
603  
604  
605  
606  
607  
608  
609  
610  
611

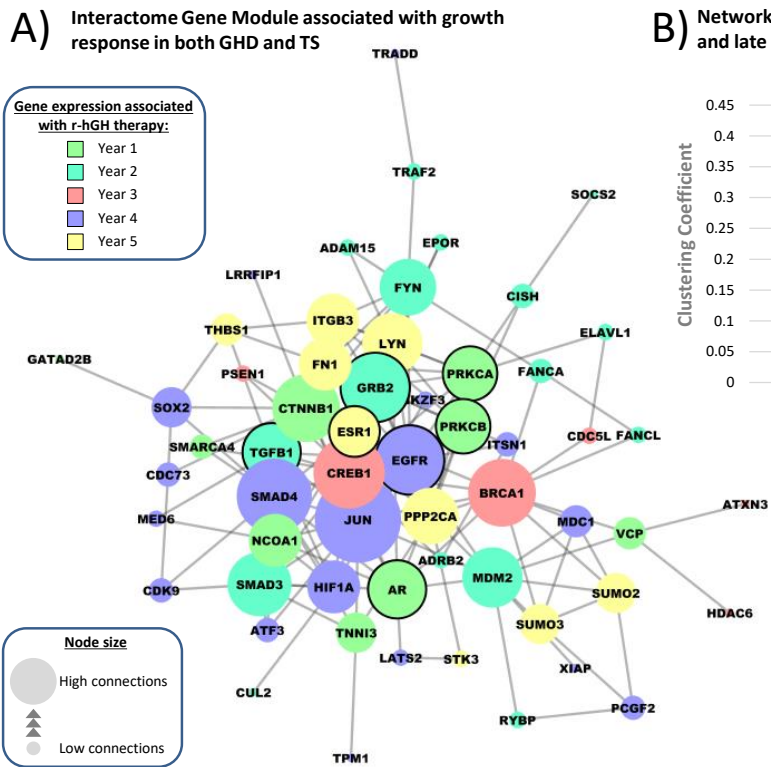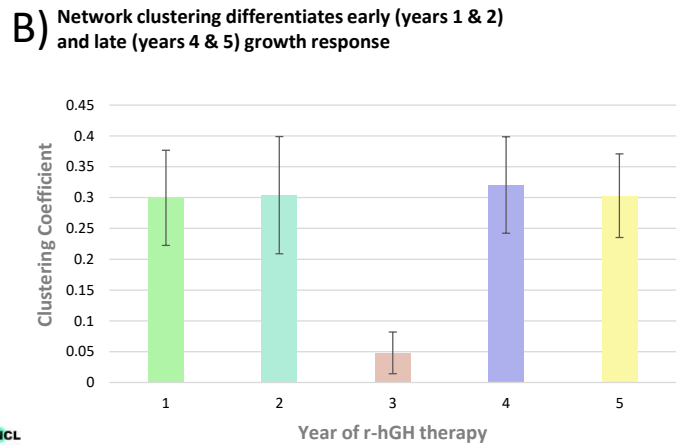

**Figure 6. Network structure of the common core network module shared in patients with growth hormone deficiency (GHD) and Turner syndrome (TS) related to response to recombinant human growth hormone (r-hGH).**

**A)** Similarities in the interactome models of the response of GHD and TS to r-hGH were identified by overlap at each year of therapy. Genes were selected that were significantly related to growth response in either or both GHD and TS. The genes related to each year of therapy were combined into a set of 58 uniquely identified genes and this set was used to generate an interactome module (Reactome plugin for Cytoscape 3.6.0). Genes with a dark border also have a genetic association with growth response in either GHD or TS. Connecting lines represent known protein:protein interactions, size of the node is proportional to the number of connections made.

**B)** The clustering coefficient of the group of genes in the network module associated with each year of therapy was determined and presented as a histogram (average  $\pm$  standard error of the mean). The clustering coefficient measures the tendency of nodes to cluster together within a network.

**C)** The correlation coefficient linking gene expression with growth response at each year of therapy was mapped to the network model, red = positive correlation, green = negative correlation. Genes with a thick border also have a genetic association with growth response in either GHD or TS.

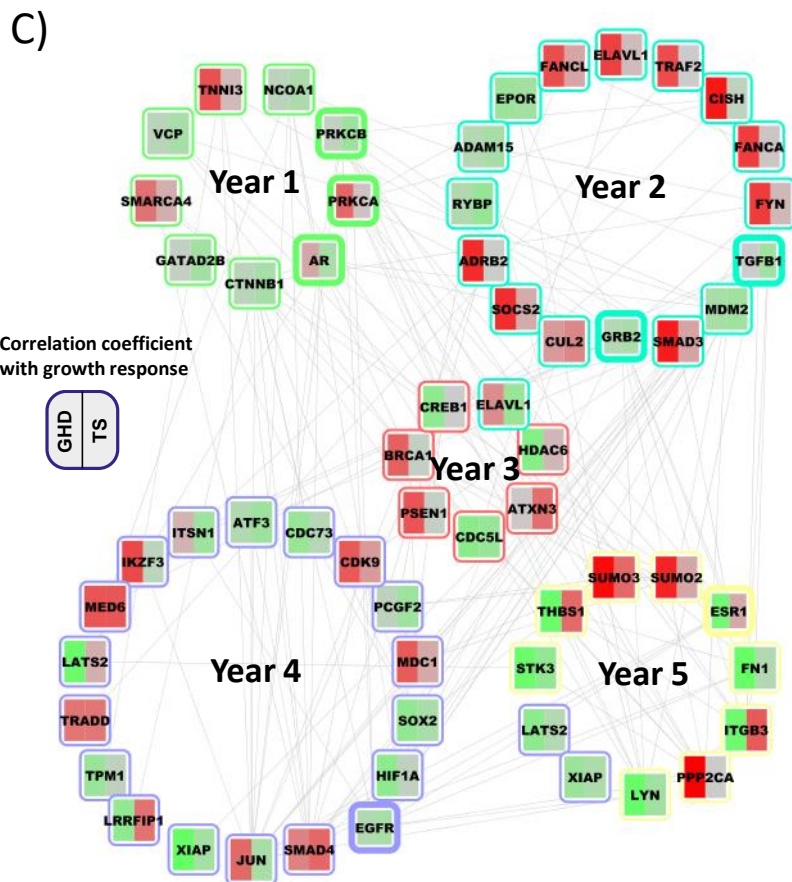

612  
613  
614  
615  
616  
617  
618  
619

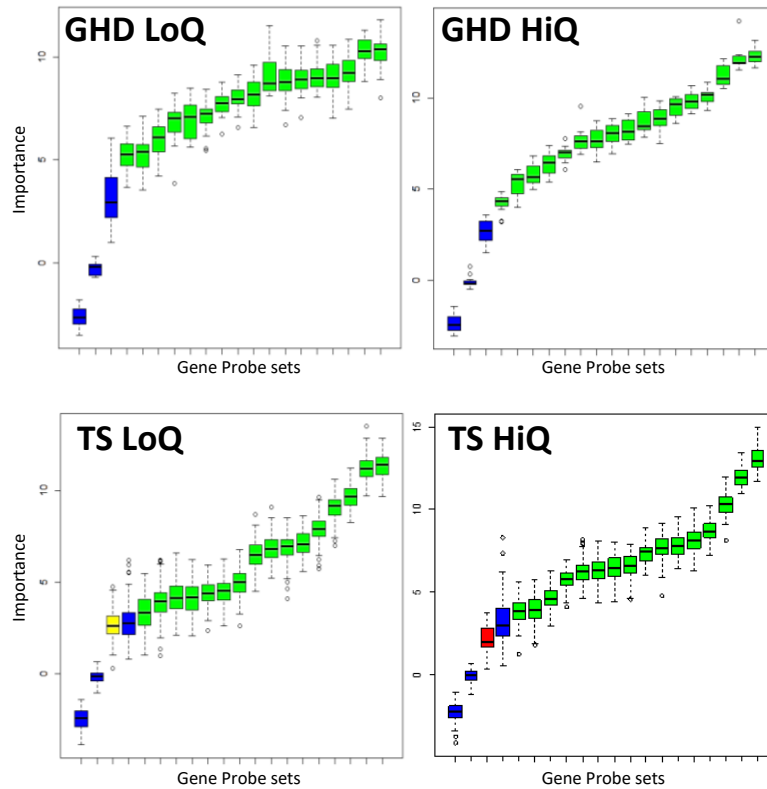

620 **Figure 7. Predictive value of an identical set of blood gene expression markers identified by network analysis**  
621 **in the classification of response to recombinant human growth hormone (r-hGH) in patients with growth**  
622 **hormone deficiency (GHD) and Turner syndrome (TS). First year growth response is used as an example.**  
623 Similarities in the interactome models of the response of GHD and TS to r-hGH were identified by overlap at  
624 each year of therapy. Genes were selected that were significantly related to growth response in either or both  
625 GHD and TS, generating an identical set of gene probesets used for prediction of both high and low response  
626 in both GHD and TS. BORUTA, an all relevant feature selection wrapper random forest based algorithm, was  
627 used to confirm the importance of gene expression probe-sets used for classification of response to r-hGH.  
628 The BORUTA algorithm uses a 100-fold permutation to define the noise present in the data; the noise is  
629 modelled as shadow variables and used as a basis to assess confidence in the data. Green = confirmed gene  
630 probeset, yellow = tentative gene probeset, red = rejected gene probeset, blue = shadow variables (high,  
631 medium and low shadow variables are derived to define the noise within the dataset). Low quartile (left  
632 column- LoQ) and high quartile (right column- HiQ) are shown for first year growth response to r-hGH in GHD  
633 and TS. The same group of gene probesets are used in each case.

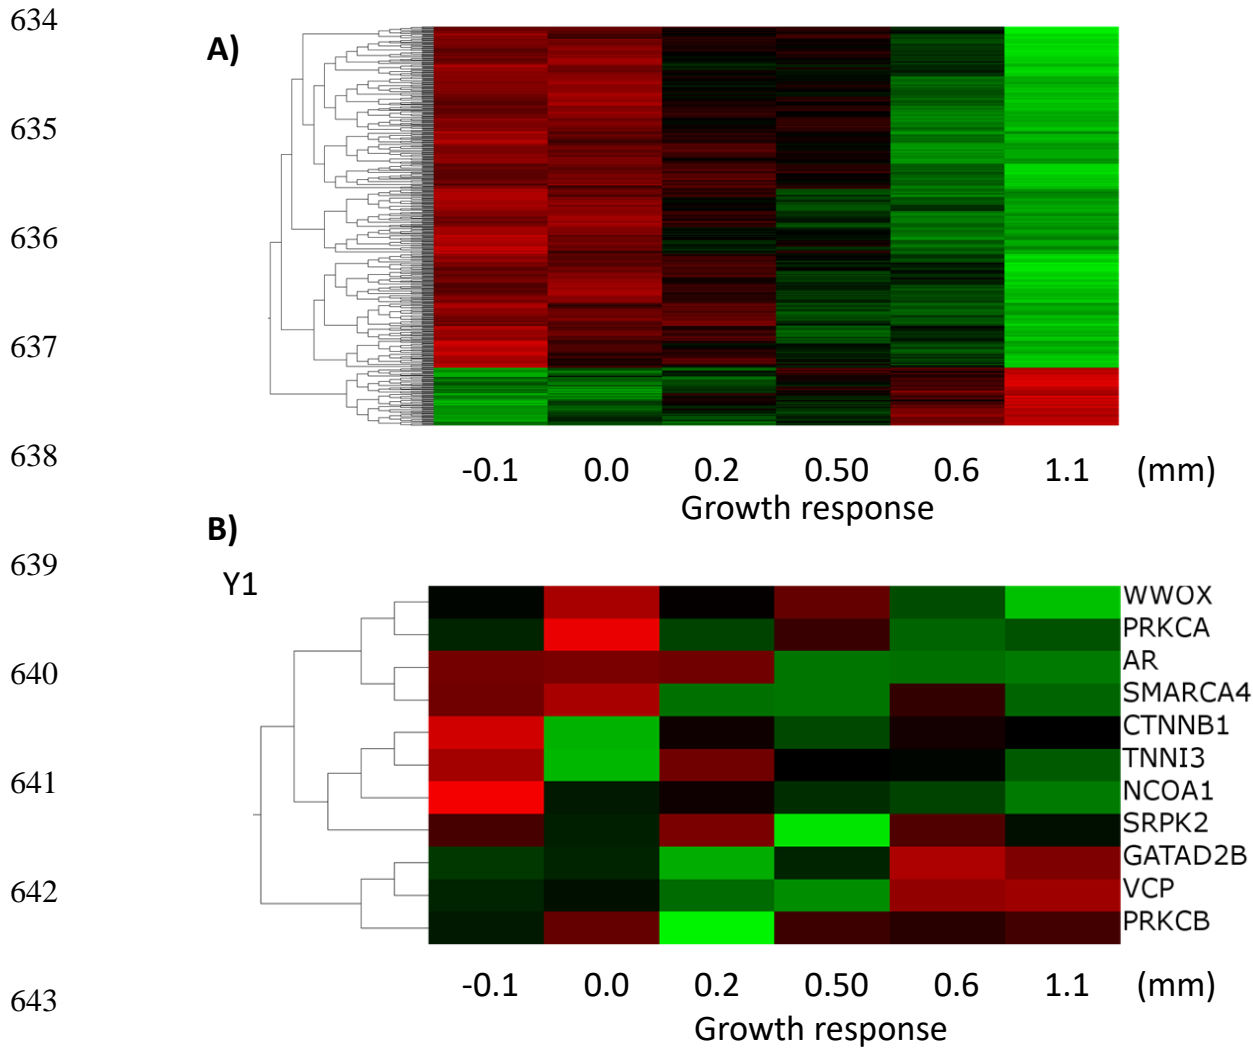

644 **Figure 8. Gene level summary of DNA methylation in GHD patients is related to growth response as**  
 645 **measured by Knemometry.** Whole epigenome measurements of six GHD patients with growth response after  
 646 4 days of r-hGH therapy measured by knemometry were available from previously published data (GSE57107).  
 647 A gene level summary of DNA methylation was conducted using median values in Qlucore Omics Explorer  
 648 (version 3.3) (n=20618). **A)** Rank regression of whole genome DNA methylation against growth response after  
 649 4 days of r-hGH as measured by knemometry ( $p < 0.01$ ) found 497 genes with differential methylation the  
 650 majority of which showed increased methylation at low rates of growth (negative correlation). **B)** Whole  
 651 genome methylation in the six GHD patients ordered by growth response in the sets of genes identified as  
 652 predicting response to r-hGH in the first year of therapy in both GHD and TS.
